# Supplementary material
Source: publisher site journal article supplement (https://www.spandidos-publications.com/6914/downloadSupplementary)
Supplement: Supplementary file 1 [file downloadSupplementary]

**Supplementary tables**

Table SI. Distribution of cases by categories of CK2 $\alpha$  staining.

|         | CK2 $\alpha$ staining status |        |          |          |          |
|---------|------------------------------|--------|----------|----------|----------|
| No. (%) | 1                            | 2      | 3        | 4        | 5        |
|         | 0                            | 8 (7%) | 50 (42%) | 39 (33%) | 21 (18%) |

CK2 $\alpha$ , casein kinase 2 alpha.

Table SII. Univariate and Cox regression multivariable stepwise procedure of recurrence-free survival in patients with non-mucinous invasive adenocarcinoma (N=82).

| Characteristics                                             | Univariate analysis |        |              |         | Multivariate analysis |              |         |
|-------------------------------------------------------------|---------------------|--------|--------------|---------|-----------------------|--------------|---------|
|                                                             | No.                 | HR     | 95% CI       | P-value | HR                    | 95% CI       | P-value |
| Age ( $\geq 70$ )                                           | 40                  | 1.199  | 0.519-2.768  | 0.671   |                       |              |         |
| Sex (male)                                                  | 49                  | 1.458  | 0.592-3.589  | 0.412   |                       |              |         |
| Lymph node metastasis (positive)                            | 13                  | 13.503 | 5.465-33.363 | <0.001  | 12.538                | 5.107-30.783 | <0.001  |
| p-stage (II-III)                                            | 17                  | 9.329  | 3.774-23.060 | <0.001  |                       |              |         |
| Lymphatic invasion (positive)                               | 17                  | 4.879  | 2.068-11.511 | <0.001  |                       |              |         |
| Microscopic vascular invasion (positive)                    | 24                  | 3.327  | 1.411-7.843  | 0.006   |                       |              |         |
| Histological grade (3)                                      | 29                  | 1.639  | 0.698-3.850  | 0.257   |                       |              |         |
| Epidermal growth factor receptor gene mutation (Neg and NE) | 50                  | 0.759  | 0.327-1.761  | 0.520   |                       |              |         |
| Anaplastic lymphoma kinase gene translocation (Neg and NE)  | 80                  | 0.047  | <0.001-1000< | 0.598   |                       |              |         |
| Nucleolar casein kinase 2 alpha (positive)                  | 43                  | 4.114  | 1.475-11.472 | 0.007   | 3.772                 | 1.348-10.556 | 0.011   |

HR, hazard ratio; CI, confidence interval; Neg, negative; NE, not evaluated.

Table SIII. Univariate and Cox regression multivariable stepwise procedure of overall survival in patients with non-mucinous invasive adenocarcinoma (N=82).

| Characteristic                                              | No. | Univariate analysis |              |         | Multivariate analysis |              |         |
|-------------------------------------------------------------|-----|---------------------|--------------|---------|-----------------------|--------------|---------|
|                                                             |     | HR                  | 95% CI       | P-value | HR                    | 95% CI       | P-value |
| Age ( $\geq 70$ )                                           | 40  | 2.734               | 0.706-10.577 | 0.145   | 9.834                 | 2.060-46.939 | 0.004   |
| Sex (male)                                                  | 49  | 2.735               | 0.580-12.890 | 0.203   |                       |              |         |
| Lymph node metastasis (positive)                            | 13  | 5.949               | 1.720-20.580 | 0.005   | 8.302                 | 2.126-32.422 | 0.002   |
| p-stage (II-III)                                            | 17  | 4.139               | 1.197-14.311 | 0.025   |                       |              |         |
| Lymphatic invasion (positive)                               | 17  | 4.213               | 1.217-14.577 | 0.023   | 9.101                 | 2.096-39.518 | 0.003   |
| Microscopic vascular invasion (positive)                    | 24  | 2.687               | 0.775-9.308  | 0.119   |                       |              |         |
| Histological grade (3)                                      | 29  | 4.724               | 1.221-18.274 | 0.024   |                       |              |         |
| Epidermal growth factor receptor gene mutation (Neg and NE) | 50  | 5.834               | 0.738-46.127 | 0.095   |                       |              |         |
| Anaplastic lymphoma kinase gene translocation. (Neg and NE) | 80  | 20.913              | <0.001-1000< | 0.731   |                       |              |         |
| Nucleolar casein kinase 2 alpha (positive)                  | 43  | 2.128               | 0.550-8.238  | 0.274   |                       |              |         |

HR, hazard ratio; CI, confidence interval; Neg, negative; NE, not evaluated.
